# Supplementary material for: MX1 and UBE2L6 are potential metaflammation gene targets in both diabetes and atherosclerosis
Source: PeerJ. 2024 Feb 21;12:e16975. doi: 10.7717/peerj.16975 (PMC10893863; doi:10.7717/peerj.16975)
Supplement: Supplemental Information 1 [file peerj-12-16975-s001.xls]

## Sheet: venn3_STZ_hcvscontrol_hc_STZvsc
Gene_ID	Control1	Control2	Control3	Control4	HC+STZ1	HC+STZ2	HC+STZ3	HC+STZ4	HL+STZ1	HL+_STZ2	HL+STZ3	HL+STZ4	STZ+HC1	STZ+HC2	STZ+HC3	STZ+HL1	STZ+HL2	STZ+HL3	STZ+HL4	STZ+HL5	gene_name	gene_chr	gene_start	gene_end	gene_strand	gene_length	gene_biotype	gene_description	tf_family
ENSSSCG00000035297	0.27845	0.292928	0.424758	0.144645	6.71862	2.42381	6.6658	3.88179	0.764583	0.0944203	0.134661	0.416759	38.9892	3.269	1.06702	0.921254	0.170356	0.100649	0.202381	0.523574	ISG12(A)	7	115356519	115363069	+	3500	protein_coding	PF06140:Interferon-induced 6-16 family	-
novel.739	0.592943	0	0.726827	0.819034	2.11352	17.7189	21.0988	6.72238	0.625441	3.16673	0.548415	0.998395	5.25276	8.90547	3.74671	0.248673	0.52814	1.32614	0.255173	0.5789	-	2	72129492	72138749	-	1461	-	-	-
ENSSSCG00000046640	10.236	20.6296	11.7284	101.16	601.498	430.847	1273.08	125.74	14.6125	188.089	13.178	265.074	400.915	983.102	58.6413	30.0952	74.7184	27.8224	52.156	55.9173	OAS1	14	38851918	38859409	-	1005	protein_coding	PF10421:2'-5'-oligoadenylate synthetase 1, domain 2, C-terminus	-
ENSSSCG00000037572	14.7146	6.96586	14.6593	19.5578	64.7	116.52	115.909	55.4059	3.22516	10.104	8.99543	8.55913	58.7104	35.2725	27.3329	10.7153	9.35866	10.0633	15.6354	22.8117	EPSTI1	11	24116985	24216219	+	1619	protein_coding	-	-
ENSSSCG00000023785	3.5472	3.79948	5.88185	5.94823	25.7474	21.9294	29.15	4.58215	3.40147	5.41272	5.81072	5.31394	14.4083	9.00052	10.1007	7.0731	6.09971	5.15346	6.31709	5.84894	TMEM156	8	30289407	30342607	-	3358	protein_coding	PF15106:TMEM156 protein family	-
ENSSSCG00000012077	43.7864	28.8156	53.2908	86.2514	511.63	347.875	981.315	188.05	15.5219	33.4986	18.0485	57.33	229.707	423.554	48.6647	42.2276	30.5273	13.0411	30.4799	108.88	MX1	13	204843754	204868922	+	2708	protein_coding	PF01031:Dynamin central region|PF00350:Dynamin family|PF02212:Dynamin GTPase effector domain	-
ENSSSCG00000009720	0.697871	0.262198	1.71089	1.12287	6.41472	8.35386	6.11352	5.27465	0.560853	1.38605	0.990793	1.65629	6.02538	3.27822	2.42565	0.724727	1.32931	0.581083	1.31001	2.04763	DDX60	14	21083350	21163563	+	6517	protein_coding	PF00271:Helicase conserved C-terminal domain|PF00270:DEAD/DEAH box helicase	DEAD
ENSSSCG00000008648	2.47898	1.11427	4.49731	11.1874	45.3303	65.1242	248.612	7.83532	0.611263	1.92574	1.61846	7.48807	36.5236	58.7072	4.20553	2.0415	4.00004	1.76869	3.37506	14.0815	RSAD2	3	128877186	128897847	-	4805	protein_coding	PF13353:4Fe-4S single cluster domain|PF04055:Radical SAM superfamily	Radical_SAM
ENSSSCG00000017797	4.36309	2.39585	0.634739	0.967948	7.36191	14.6085	1.09787	9.24086	2.61539	0.902327	0.907777	1.0226	0.707189	0.280197	0.271818	0.935022	0.823062	6.35601	3.21059	0.66575	SLC6A4	12	46285997	46314378	-	4517	protein_coding	PF03491:Serotonin (5-HT) neurotransmitter transporter, N-terminus|PF00209:Sodium:neurotransmitter symporter family	SNF
ENSSSCG00000006956	35.8148	35.4981	14.1014	14.1484	15.6234	8.23439	9.08699	17.1301	20.6434	10.3973	16.8122	8.66438	8.94087	8.746	10.5642	31.6577	7.9898	12.092	8.96223	8.86995	ZC3H3	4	1010638	1089738	+	6431	protein_coding	-	-
ENSSSCG00000004195	2.4334	2.33732	1.4871	0.689489	13.1895	13.1521	0.385416	13.1677	1.39233	0.681643	1.27403	0.443384	0.799288	0.280294	0.108298	0.495478	0.691072	8.97744	0.868125	0.198937	ARG1	1	32006038	32028986	-	6141	protein_coding	PF00491:Arginase family	-
ENSSSCG00000034727	78.1371	55.1359	19.6982	19.7064	24.2539	11.8773	15.6132	29.306	81.0423	24.7085	23.678	16.5162	14.1874	12.3377	14.7659	55.7704	16.9995	14.8678	8.24796	11.0671	CCDC24	6	167301562	167305255	-	1469	protein_coding	PF15669:Coiled-coil domain-containing protein 24 family	-
ENSSSCG00000046331	1.53256	1.47405	0.107349	0.688583	0.384192	0.229871	0.113937	0	0.738997	0.289535	0.400226	0.0786443	0.0472573	0.204715	0.124121	1.02838	0.05673	0.284894	0.256277	0.228002	-	X	122935427	122938087	+	2473	lncRNA	-	-
ENSSSCG00000001063	7.57049	8.85728	16.5823	23.6206	17.2267	50.9858	52.6529	15.2407	12.1114	7.25143	8.11442	14.2164	28.711	57.9528	34.3786	16.3199	30.364	21.9234	16.9049	19.8019	MYLIP	7	12117240	12137929	+	3061	protein_coding	PF13920:Zinc finger, C3HC4 type (RING finger)|PF09379:FERM N-terminal domain|PF00373:FERM central domain	Band_41
ENSSSCG00000016032	0.357479	1.1282	0.131459	0.126612	6.20772	2.58642	0.232545	1.21585	0.34116	0.348502	0.181524	0.307648	0.0643012	0.0557095	0.0140738	0.224883	0.0578927	1.68383	0.389731	0.0904846	TFPI	15	92345075	92409905	-	3635	protein_coding	PF00014:Kunitz/Bovine pancreatic trypsin inhibitor domain	Kunitz_BPTI
ENSSSCG00000022204	0.480149	0.332312	0.557588	1.44461	13.6917	3.13295	9.14674	1.94824	0.647361	0.507725	0.269479	0.862371	2.13189	5.14531	1.10435	0.736585	0.454275	0.27746	0.29581	1.40907	AGRN	6	63365983	63398311	+	8570	protein_coding	PF07648:Kazal-type serine protease inhibitor domain|PF00054:Laminin G domain|PF01390:SEA domain|PF00053:Laminin EGF domain|PF03146:Agrin NtA domain|PF00050:Kazal-type serine protease inhibitor domain	Laminin_EGF
ENSSSCG00000033641	1.07667	1.07602	0.316747	0.972406	0	0.108697	0.294164	0.488263	0.16224	0.794073	0.164017	0.640556	0.329231	0.176178	0.203464	1.34334	0.374883	0.0766188	0.148271	0.315352	COL8A2	6	92246459	92271454	-	4023	protein_coding	PF01391:Collagen triple helix repeat (20 copies)|PF00386:C1q domain	Collagen
ENSSSCG00000039158	0	0	0.120442	0.261002	0	1.78552	5.79513	0.928299	0	0.104118	0.0178191	0.257356	0.868957	1.22498	0.50288	0	0.225424	0.033296	0.140948	0.106588	-	8	53338028	53340672	+	2645	protein_coding	-	-
ENSSSCG00000016716	0.0618425	0	0.060645	0.0525681	0	0.441199	0.0858228	0.99716	0.0248503	0.0733961	0.134584	0.101816	0.192814	0.481877	0.185039	0.121035	0.106829	0.0251479	0.0283882	0.116283	GSDME	18	47526793	47583732	+	5253	protein_coding	PF04598:Gasdermin family	-
ENSSSCG00000014565	91.7052	73.0626	86.1853	221.277	515.732	396.994	990.366	162.591	156.116	321.834	84.5295	405.073	415.406	689.503	104.206	116.997	172.705	112.968	217.238	185.914	-	2	37934	154734	+	2978	protein_coding	PF04505:Interferon-induced transmembrane protein	-
ENSSSCG00000032474	2.26067	0.317095	0.775915	3.93937	140.5	24.8617	31.1767	16.8588	1.04467	2.68302	2.1647	1.18425	12.8497	7.43361	4.1653	2.37025	1.56207	1.25636	1.68633	7.88028	CXCL10	8	71693339	71695948	-	1437	protein_coding	PF00048:Small cytokines (intecrine/chemokine), interleukin-8 like	-
ENSSSCG00000003763	11.3014	7.6989	12.6386	26.3836	71.67	78.8527	178.143	24.3773	4.35259	7.41188	5.90552	17.3172	53.4244	87.9143	11.9023	12.4807	12.4393	6.37333	10.0337	33.1047	IFI44	6	134612207	134650811	-	3344	protein_coding	-	-
ENSSSCG00000033880	15.9599	13.7274	10.4634	14.0442	11.3611	9.42832	7.52214	8.13291	12.6933	10.6195	14.3998	5.41745	7.12095	5.90356	9.32308	13.8161	5.18232	11.1513	6.19273	7.42181	TSPAN32	2	1585017	1602883	+	5394	protein_coding	PF00335:Tetraspanin family	Tetraspannin
ENSSSCG00000041356	0.605703	0.955794	1.10545	0.757999	0	0.203831	0.420286	0.50867	0.628759	0.393662	0.439385	0.543936	0.217901	0.4405	0.254361	0.804411	0.261579	0.547345	0.63718	0.467246	-	7	21614987	21621632	-	3218	protein_coding	PF00125:Core histone H2A/H2B/H3/H4	Histone
ENSSSCG00000009883	0	0	0	0.0458127	1.37135	0.748688	2.14284	0	0	0.175444	0	0.116158	0.286953	0.463627	0.0203697	0	0.0279302	0.0350658	0.0593762	0.0280633	RPH3A	14	38867099	39161537	-	5023	protein_coding	PF00168:C2 domain|PF02318:FYVE-type zinc finger	C2
ENSSSCG00000018046	42.1817	58.1734	16.5533	18.9732	22.2324	8.21604	10.3166	21.1794	49.9514	22.5545	24.328	16.2965	8.0968	17.909	12.3935	37.9127	9.60714	15.0921	15.1894	11.8034	-	12	59977416	60005195	-	1453	protein_coding	PF01554:MatE	MatE
ENSSSCG00000004902	6.64614	7.83552	3.76439	1.80197	15.0811	18.0467	3.33946	12.4716	3.93688	1.34054	3.09222	1.85226	2.26727	1.50003	1.02858	3.74845	1.67016	7.96804	5.16803	4.2761	RNF152	1	159530623	159601981	+	945	protein_coding	PF14634:zinc-RING finger domain	-
ENSSSCG00000044966	0.556106	1.49505	0.621079	0.971678	0	0.0998085	0.450184	0	0.782114	0.691428	0.457195	0.610374	0.200058	0.404431	0.3503	0.894026	0.310206	0.552779	0.468004	0.563044	-	18	42481783	42486481	-	3505	lncRNA	-	-
ENSSSCG00000031724	0.17007	0.817888	0.250166	0.18587	0.373051	1.35395	1.07472	1.32215	0.864009	0.630246	0.782527	0.174546	1.00514	0.636091	1.91686	1.13102	0.291163	0.296392	0.585519	1.45485	LYNX1	4	1450147	1455889	+	4457	protein_coding	PF00087:Snake toxin and toxin-like protein	-
ENSSSCG00000034272	49.2161	48.4635	16.6693	27.0486	26.7188	11.4406	15.8975	23.1715	63.9824	21.817	26.0676	14.9454	14.6232	13.1044	20.109	50.5454	15.9585	19.2008	11.761	12.1269	DENND6B	5	376551	389332	+	3956	protein_coding	PF09794:Transport protein Avl9|PF08616:Stabilization of polarity axis	-
novel.1220	0	0.251402	0.0732341	0.101569	0.98287	1.67677	5.81411	0	0.0180053	0.121553	0.0130018	0.134129	0.6018	1.1033	0.141127	0.012528	0.116105	0.085031	0.143981	0.116658	-	7	79202672	79206296	-	3625	-	PF02337:Retroviral GAG p10 protein|PF00517:Retroviral envelope protein	-
ENSSSCG00000044892	4.14345	2.79749	0.84903	1.03822	0.271304	0.349629	0.563212	1.77619	1.41647	0.660565	2.13989	0.902461	0.867662	0.693903	0.671984	2.72328	0.620944	0.867601	0.809064	0.898959	-	17	62715650	62730005	-	3502	lncRNA	-	-
ENSSSCG00000009881	45.1611	46.0839	31.5542	163.609	575.546	205.421	1000.59	76.8388	36.3397	78.4831	29.681	158.629	190.636	510.999	62.17	61.5129	97.8087	19.7622	77.7835	88.9451	OAS2	14	38827660	38860820	-	4316	protein_coding	PF10421:2'-5'-oligoadenylate synthetase 1, domain 2, C-terminus|PF01909:Nucleotidyltransferase domain	NTP_transf_2
ENSSSCG00000024285	6.73145	9.81366	6.86099	4.95602	4.12736	3.88485	2.96524	4.60704	6.53332	3.70695	5.07533	3.1296	4.26168	3.1347	4.20686	7.60233	4.85842	4.56935	3.531	4.58834	DLG4	12	52550141	52575156	-	4086	protein_coding	PF10608:Polyubiquitination (PEST) N-terminal domain of MAGUK|PF10600:PDZ-associated domain of NMDA receptors|PF00595:PDZ domain (Also known as DHR or GLGF)|PF00625:Guanylate kinase|PF00018:SH3 domain	PDZ
ENSSSCG00000028201	7.20886	5.71196	7.02415	9.26987	7.53626	11.0994	18.4705	16.9718	8.52383	12.6228	6.71589	15.6196	10.6935	20.7667	10.2752	7.71908	8.92233	9.19348	11.3955	11.1811	CWF19L2	9	35967044	36059749	-	3530	protein_coding	PF04677:Protein similar to CwfJ C-terminus 1|PF04676:Protein similar to CwfJ C-terminus 2	-
ENSSSCG00000025463	3.48488	4.25622	0.35841	0.585227	10.9628	15.9537	1.76934	8.73699	1.8136	1.5045	1.14684	1.64108	0.831709	0.532487	0.13653	0.734323	0.611168	7.98417	2.35273	0.826152	PROS1	13	165911366	165999811	+	6370	protein_coding	PF00054:Laminin G domain|PF00008:EGF-like domain|PF00594:Vitamin K-dependent carboxylation/gamma-carboxyglutamic (GLA) domain|PF07645:Calcium-binding EGF domain|PF14670:Coagulation Factor Xa inhibitory site	EGF_CA
ENSSSCG00000051152	0.361222	1.14001	0.216472	0.119408	0	0.0324156	0.125323	0.121342	0.217726	0.0408291	0.262035	0.144171	0.0866326	0.0750571	0.094808	0.252487	0.0779985	0.0652838	0.124361	0.330897	-	5	82544777	82551837	-	2698	lncRNA	-	-
ENSSSCG00000017416	17.1055	10.3595	14.2707	27.9024	126.164	63.612	159.646	38.1521	14.6631	12.9302	8.52461	24.5484	51.1057	61.0786	15.0425	13.6594	10.9036	5.19093	9.99512	25.1633	DHX58	12	20647692	20656692	+	2969	protein_coding	PF11648:C-terminal domain of RIG-I|PF04851:Type III restriction enzyme, res subunit|PF00271:Helicase conserved C-terminal domain	Helicase_C
ENSSSCG00000011553	13.1044	12.4941	5.81291	6.52336	5.71179	2.94944	3.72384	3.87224	11.2164	3.38116	4.95732	3.00381	3.68614	4.01841	6.25103	12.288	4.14846	3.42629	2.80608	4.17053	-	13	66095817	66123979	+	5115	protein_coding	PF03133:Tubulin-tyrosine ligase family	TTL
ENSSSCG00000030108	10.836	10.8093	14.9983	59.4132	120.884	79.6236	373.776	27.2705	39.1082	51.4216	13.8149	45.5726	85.161	138.385	20.4006	16.0976	34.3417	11.7304	22.2058	43.2207	ZNFX1	17	50925789	50958705	-	7335	protein_coding	PF13086:AAA domain|PF13087:AAA domain	-
ENSSSCG00000011874	4.4849	5.80988	3.52571	16.415	43.9036	25.6699	92.7617	10.9818	20.3527	15.0257	6.38851	10.41	22.0614	34.5796	7.98502	6.23344	9.89232	5.43359	9.33456	11.9258	PARP14	13	137809503	137865383	-	5843	protein_coding	PF02825:WWE domain|PF00644:Poly(ADP-ribose) polymerase catalytic domain|PF01661:Macro domain	A1pp
ENSSSCG00000039322	116.999	135.303	15.2571	16.0465	284.85	434.27	26.5573	161.809	82.2743	35.4528	51.4653	45.8275	30.0004	18.0392	5.09624	57.7679	27.2792	186.427	37.995	16.3826	NRGN	9	51974528	51975691	+	261	protein_coding	-	-
ENSSSCG00000013849	304.573	553.292	73.3592	61.9628	811.313	1214.78	148.829	893.475	240.8	149.336	224.408	162.089	80.9371	109.335	31.6671	133.532	81.6741	635.82	160.643	98.7831	TPM4	2	61453721	61476781	-	3000	protein_coding	PF00261:Tropomyosin	-
ENSSSCG00000033878	17.0105	25.5766	1.87154	3.3151	41.1349	93.1202	9.37064	56.5703	21.2063	10.467	12.6045	7.89872	4.35827	3.45266	0.548826	8.83919	3.54765	46.1934	10.8271	2.48439	RAB38	9	21577172	21640115	-	1305	protein_coding	PF00071:Ras family	Ras
ENSSSCG00000011867	2.31041	2.00578	0.225467	0.271707	6.8884	6.31812	0.706241	3.88245	0.851779	0.621808	0.756641	0.921574	0.395408	0.398506	0.074181	0.404516	0.45045	4.33726	1.18542	0.442864	MYLK	13	136508808	136809674	+	9655	protein_coding	PF00041:Fibronectin type III domain|PF07679:Immunoglobulin I-set domain|PF00069:Protein kinase domain	Pkinase
ENSSSCG00000038713	2.88763	2.53148	1.92152	1.87016	1.05567	0.638577	0.644039	0	2.15492	1.25894	1.22691	2.03749	1.18722	0.707157	1.33174	2.96993	1.62562	2.12481	1.15985	1.40216	CRIP2	AEMK02000452.1	3499325	3504404	+	1575	protein_coding	PF00412:LIM domain	LIM
ENSSSCG00000050367	1.04233	2.92406	0.0378572	0	0	0.109127	0.0200903	0	0.116345	0.0196358	0.487276	0.0866699	0.124992	0.126339	0.0364766	0.615233	0.175054	0.141285	0.0265817	0.0502539	-	18	36937861	37021223	+	2805	lncRNA	-	-
ENSSSCG00000029030	3.1782	3.10401	5.70722	5.04039	6.61481	9.50594	7.60995	6.59823	2.66525	5.40366	4.63106	7.13889	8.80175	6.60092	7.01594	3.03737	8.16412	5.58605	7.45224	6.75078	SMCHD1	6	103808066	103986144	-	13322	protein_coding	PF06470:SMC proteins Flexible Hinge Domain	SMC_hinge
ENSSSCG00000007508	14.1046	13.1133	19.888	47.8494	196.544	131.677	285.886	34.524	11.9601	31.457	6.44658	34.4325	70.5089	116.793	16.9193	12.6012	15.5637	8.42518	14.3051	34.1091	ZBP1	17	57973096	57986136	-	3831	protein_coding	-	-
ENSSSCG00000007649	2.38803	8.49577	0.851559	1.23639	2.38098	0.438338	0.361529	0.525068	2.53854	0.55211	1.07718	0.272937	0.640412	0.487179	1.51793	3.96962	1.04067	0.600302	0.433498	1.26229	GPC2	3	8169343	8175646	-	2494	protein_coding	PF01153:Glypican	-
ENSSSCG00000012795	83.1769	71.5723	39.8296	39.6026	43.1936	26.3802	27.5983	38.2188	48.0832	32.1674	44.3198	22.8451	29.8353	28.122	37.7043	74.7917	30.3826	33.2584	29.5568	28.105	IRAK1	X	124717612	124724860	-	3118	protein_coding	PF00531:Death domain|PF00069:Protein kinase domain	Pkinase
ENSSSCG00000007992	12.5821	14.8544	6.04857	5.45874	5.5333	3.8511	3.10584	5.6501	9.03015	4.52207	5.05457	2.60375	3.87344	3.68189	6.3512	11.3406	4.04539	4.62856	3.18264	3.73096	PIGQ	3	41160656	41176508	-	7040	protein_coding	PF05024:N-acetylglucosaminyl transferase component (Gpi1)	-
ENSSSCG00000007366	16.9533	11.7902	15.8975	9.36569	9.00247	9.35767	7.26186	6.91984	16.0033	12.8624	12.5455	9.21405	7.09836	9.04774	7.6663	18.0597	10.113	10.8352	9.97778	8.05498	MYBL2	17	46256257	46287929	+	3430	protein_coding	PF13921:Myb-like DNA-binding domain|PF00249:Myb-like DNA-binding domain|PF09316:C-myb, C-terminal	Myb_DNA-binding
ENSSSCG00000034551	20.5431	10.8666	5.52003	3.05836	4.58251	1.68728	3.38241	0.526335	13.7814	3.18782	7.22378	2.03242	3.71604	1.95342	4.71557	12.6555	3.23291	3.96447	2.39748	2.76989	SCX	4	501172	502994	-	933	protein_coding	PF00010:Helix-loop-helix DNA-binding domain	HLH
ENSSSCG00000008039	11.7219	9.42634	5.49875	5.54484	5.6245	3.50466	2.40488	5.02613	6.6577	2.8091	6.72079	2.96058	4.14596	2.38442	5.40471	10.2338	3.49547	4.70932	3.16251	2.70211	NTHL1	3	39934912	39941712	+	3843	protein_coding	PF00730:HhH-GPD superfamily base excision DNA repair protein|PF00633:Helix-hairpin-helix motif	HhH-GPD
ENSSSCG00000033786	3.19033	3.69669	4.28476	4.30364	4.15824	7.39391	5.7749	9.92485	2.92625	5.50315	5.31285	7.88911	6.30412	4.92858	9.04337	4.22726	5.76568	5.97898	6.74938	3.9524	-	2	44890124	44961000	+	2342	protein_coding	PF00071:Ras family	Ras
ENSSSCG00000027745	5.98175	6.10048	4.17132	14.2865	22.1964	26.6451	44.1955	13.5634	8.10232	1.27618	1.22222	6.45357	11.8714	34.1184	9.96164	6.19503	8.65397	6.18245	6.10954	6.11406	ABCG1	13	205561951	205628425	+	6517	protein_coding	PF00005:ABC transporter|PF01061:ABC-2 type transporter	ABC2_membrane
ENSSSCG00000005423	2.38278	3.14154	2.16828	8.73414	9.08386	16.8578	26.8094	9.59459	5.02988	1.39721	1.02804	4.94768	8.47467	19.5217	4.76338	1.67569	5.18669	4.23118	7.52279	5.93268	ABCA1	1	246144277	246278492	-	10407	protein_coding	PF00005:ABC transporter|PF12698:ABC-2 family transporter protein	ABC_tran
ENSSSCG00000011357	50.5627	45.026	44.1697	76.9457	121.221	107.258	191.533	89.9015	50.1793	80.8801	55.744	98.2991	108.746	141.784	56.0909	63.983	58.0365	59.3713	66.4882	67.4806	SHISA5	13	31180844	31205731	-	1981	protein_coding	PF13908:Wnt and FGF inhibitory regulator	-
ENSSSCG00000016734	92.9307	60.8202	45.3187	36.2338	33.6826	21.4662	25.371	40.0188	69.7959	33.4824	42.9314	19.931	32.1487	21.9294	38.4729	70.0828	20.8048	30.88	23.6454	22.5925	CCM2	18	50396423	50450132	-	2581	protein_coding	PF16545:Cerebral cavernous malformation protein, harmonin-homology	-
ENSSSCG00000023379	22.9212	16.6205	19.1943	44.0409	106.166	67.9323	163.266	50.5703	18.4108	33.4451	14.9973	45.9757	68.1501	84.0406	22.0486	28.0918	17.9022	15.9595	20.3326	28.0314	UBE2L6	2	13354013	13370801	+	4318	protein_coding	PF00179:Ubiquitin-conjugating enzyme	UQ_con
ENSSSCG00000044127	1.18589	2.10523	0.327072	0.598525	0	0.179584	0.115715	0	0.312721	0.603187	0.387116	0.366078	0.346629	0.346516	0.105048	0.52843	0.672179	0.72335	0.510346	0.771867	-	1	128715231	128801764	-	1461	protein_coding	PF00225:Kinesin motor domain	Kinesin
ENSSSCG00000017197	10.9277	13.0743	4.98327	9.57768	4.3469	4.50433	5.40698	5.13537	6.84261	5.05426	6.50598	6.17783	5.43853	5.20158	5.32315	10.65	4.50222	5.81363	6.05265	6.81778	FBF1	12	5482338	5510024	+	3825	protein_coding	-	-
ENSSSCG00000024661	21.4844	21.519	9.22246	12.9096	11.5558	8.0942	10.2811	8.77244	15.1824	11.9954	14.7969	8.13136	8.20278	9.02456	9.60557	14.6374	8.98496	11.498	8.89865	10.0547	ZNF524	6	59720722	59724166	+	2631	protein_coding	-	-
ENSSSCG00000043115	5.91342	6.03478	0.693887	1.04184	10.5321	25.2269	2.4856	15.5859	2.757	2.10802	1.90285	2.50768	1.46368	1.19329	0.238779	1.62155	1.00677	13.1742	3.54972	1.04173	-	4	92808163	92821271	-	4285	protein_coding	PF07686:Immunoglobulin V-set domain	V-set
ENSSSCG00000020906	3.40583	2.86856	2.42948	9.37514	16.0818	18.4495	52.1349	7.34568	3.92664	8.40803	4.67342	12.4294	12.2142	20.8586	3.32835	2.73658	7.26484	4.58201	7.13398	8.52181	GHSR	13	110981604	111107423	-	10206	protein_coding	PF00229:TNF(Tumour Necrosis Factor) family	-
ENSSSCG00000037579	83.3237	124.437	7.32296	7.182	257.486	243.614	52.833	144.522	48.7841	24.3819	28.5305	44.9651	23.2857	13.9649	2.68199	30.3279	16.7891	148.358	51.7474	14.5843	PPBP	8	70021433	70029998	+	4082	protein_coding	PF00048:Small cytokines (intecrine/chemokine), interleukin-8 like	-
ENSSSCG00000000262	29.3519	38.9461	16.7439	17.8406	12.5306	12.8726	15.3407	17.3184	23.4368	15.4592	20.3306	13.9021	14.0336	12.9996	15.8947	22.6342	13.4834	18.1475	16.0815	17.4063	SPRYD3	5	18320756	18353114	-	3431	protein_coding	PF00622:SPRY domain	SPRY
ENSSSCG00000039708	2.94256	0.928667	2.01991	3.25165	1.61363	11.1698	8.49895	10.8978	2.48307	3.14307	2.81764	4.09586	8.36279	10.7305	1.45968	2.59156	3.43109	5.02561	4.20422	3.3836	KLRB1	5	62244855	62257691	+	736	protein_coding	PF00059:Lectin C-type domain	Lectin_C
ENSSSCG00000014670	50.8784	52.9886	50.1635	146.792	148.338	184.485	503.451	96.2657	50.9581	77.1617	44.677	131.054	181.356	274.142	71.0689	59.9414	65.7659	47.9304	70.489	110.717	TRIM22	9	4157290	4170204	-	2554	protein_coding	PF13445:RING-type zinc-finger|PF00622:SPRY domain	SPRY
ENSSSCG00000037791	3.11374	0.453549	0.258368	0.162879	0	0.087051	0.211902	0	0.389797	0.402033	0.344025	0.397923	0.249882	0.156772	0.294209	2.97335	0.147399	0.418814	0.296861	0.311794	-	16	79399139	79420317	-	4521	protein_coding	-	-
ENSSSCG00000000455	0.461877	0.971783	0.452933	0.182767	0	0.0578846	0.132616	0.240756	0.287995	0.299736	0.214895	0.157329	0.229185	0.208491	0.158012	0.367373	0.211503	0.226678	0.28513	0.504498	LRIG3	5	24066613	24117962	-	6799	protein_coding	PF13855:Leucine rich repeat|PF13927:Immunoglobulin domain|PF07679:Immunoglobulin I-set domain	I-set
ENSSSCG00000032015	20.055	25.6842	1.5899	3.38169	66.2254	54.2811	8.08289	52.4764	10.0515	9.38303	10.4367	10.0572	4.15633	5.17216	1.95674	8.22799	7.60775	29.5185	12.6646	3.52346	SH3BGRL2	1	86358148	86481570	-	3974	protein_coding	PF04908:SH3-binding, glutamic acid-rich protein	-
ENSSSCG00000023326	27.995	25.6465	41.1985	43.2471	42.0469	68.2072	59.3076	60.1274	21.608	41.1358	46.7252	48.5869	57.8672	58.2245	49.597	30.2814	53.7623	41.7729	50.5466	49.0457	PNRC2	6	81722026	81726492	+	2785	protein_coding	PF15365:Proline-rich nuclear receptor coactivator motif	-
ENSSSCG00000038912	224.5	119.411	227.562	614.636	827.764	705.571	1580.18	497.556	289.748	463.827	106.929	930.432	692.178	1787.09	158.983	253.199	364.297	197.261	352.482	536.004	IFITM3	2	127152	129835	-	1161	protein_coding	PF04505:Interferon-induced transmembrane protein	-
ENSSSCG00000011806	0.0237348	0.0249689	0.0232752	0.0874266	1.09331	0.568692	0.345853	0.490341	0.0143061	0.0523139	0.0585398	0.00355241	0.153694	0.199737	0.0598038	0.0729967	0.00512506	0.00643441	0.0108952	0.109856	MASP1	13	124955029	125054463	-	13687	protein_coding	PF00431:CUB domain|PF00089:Trypsin|PF00084:Sushi repeat (SCR repeat)	Trypsin
ENSSSCG00000021712	39.3725	31.0772	41.4095	162.567	483.108	196.468	615.017	89.5622	207.374	138.606	43.3473	168.437	176.021	314.721	64.2978	53.4118	93.9637	39.776	68.8524	131.67	HERC6	8	130594939	130665145	-	4571	protein_coding	PF00415:Regulator of chromosome condensation (RCC1) repeat|PF00632:HECT-domain (ubiquitin-transferase)	HECT
novel.721	2.87072	3.37114	3.46982	2.63883	0	1.8063	1.56344	1.21102	1.97176	1.12059	3.71937	1.37892	2.01744	0.842727	1.89242	3.72383	1.85962	0.570106	2.04562	0.927001	-	2	4930260	4935064	-	1622	-	-	-
ENSSSCG00000039171	4.10605	3.98228	1.94072	1.37305	1.10893	1.04068	1.05879	1.15563	2.3337	1.16655	1.57248	1.20143	1.01138	1.68331	1.5379	2.3736	1.95296	2.05578	2.0122	2.6003	MRTFB	3	28964754	29167631	-	8782	protein_coding	PF02755:RPEL repeat|PF02037:SAP domain	SAP
ENSSSCG00000030408	0.294006	0.309293	0.279304	0.97623	1.41073	1.03886	4.12155	0.499987	0.376575	0.635557	0.359904	1.04785	0.905641	2.1649	0.599004	0.508624	0.42257	0.328779	0.316314	0.542193	DDX58	10	33865838	33933455	+	5893	protein_coding	PF16739:Caspase recruitment domain|PF11648:C-terminal domain of RIG-I|PF00271:Helicase conserved C-terminal domain|PF00270:DEAD/DEAH box helicase	Helicase_C
ENSSSCG00000003667	4.33198	4.12386	3.34896	2.82387	3.49776	2.09279	1.62511	1.42619	3.42005	1.96685	2.46964	1.99881	2.25159	2.06257	2.74343	3.80075	2.63405	2.28572	1.83911	2.71003	TRIT1	6	95626787	95683805	-	8149	protein_coding	PF01715:IPP transferase	IPPT
ENSSSCG00000004371	1.79427	1.58756	2.10328	2.5908	2.21549	3.35414	5.41086	3.5206	1.66163	3.78956	2.53422	3.388	3.19324	4.17208	2.52059	1.70931	3.02509	3.0973	3.48958	3.59379	CRYBG1	1	72515942	72826360	+	9113	protein_coding	PF00030:Beta/Gamma crystallin|PF00652:Ricin-type beta-trefoil lectin domain	Crystall
ENSSSCG00000013034	13.0999	10.7159	4.79202	5.56766	6.24011	4.21536	3.98772	3.74545	8.15866	4.92439	4.98275	4.07929	4.0689	5.52382	3.93443	7.68765	3.72282	6.036	4.77858	6.04266	PLCB3	2	7843340	7860193	-	4720	protein_coding	PF08703:PLC-beta C terminal|PF09279:Phosphoinositide-specific phospholipase C, efhand-like|PF00168:C2 domain|PF00387:Phosphatidylinositol-specific phospholipase C, Y domain|PF00388:Phosphatidylinositol-specific phospholipase C, X domain	PI-PLC-X
ENSSSCG00000002754	22.112	24.4577	4.37579	3.3823	71.4451	53.0023	7.39546	31.621	9.62765	8.21118	8.23871	15.0587	5.15321	7.01589	1.665	4.67251	7.76952	26.952	8.41509	6.46231	NQO1	6	17292769	17302590	+	1905	protein_coding	PF02525:Flavodoxin-like fold	Flavodoxin_2
ENSSSCG00000028047	0.853343	2.01985	0.266916	0.206355	6.53522	2.19237	0.681447	2.24629	0.496614	1.24226	0.528307	0.55162	0.280524	0.416152	0.114689	1.12609	0.457478	1.95041	0.840844	0.306439	DTNA	6	118333733	118753513	+	14720	protein_coding	PF00569:Zinc finger, ZZ type|PF09068:EF hand|PF09069:EF-hand	ZZ
ENSSSCG00000016692	12.7751	16.0814	19.206	20.8768	39.941	37.8968	34.5736	26.1378	11.0626	23.6454	17.7005	28.4748	22.0929	38.7486	23.6397	12.3663	22.0499	26.6128	25.6077	26.4802	TAX1BP1	18	44827093	44910235	-	4484	protein_coding	PF07888:Calcium binding and coiled-coil domain (CALCOCO1) like	CoCoA
ENSSSCG00000000233	2.45048	7.29313	1.1787	2.4653	1.3608	0.651357	2.21959	0.492336	2.1127	1.1123	1.32983	2.11006	0.942929	1.85624	1.43613	2.0554	1.1604	2.03078	2.16252	2.11988	ACVR1B	5	17314290	17350722	+	6982	protein_coding	PF01064:Activin types I and II receptor domain|PF08515:Transforming growth factor beta type I GS-motif|PF00069:Protein kinase domain	Pkinase
ENSSSCG00000017126	53.8586	50.6174	25.6341	22.6489	16.1151	10.53	15.926	26.3171	47.151	12.5788	28.0019	10.4422	20.027	10.0623	27.8524	48.4083	18.1483	22.7428	14.4724	14.9403	NARF	12	632362	651817	-	4186	protein_coding	PF02906:Iron only hydrogenase large subunit, C-terminal domain	Fe_hyd_lg_C
ENSSSCG00000024341	27.6154	25.4165	10.767	12.5637	12.2946	8.61963	9.12363	13.0766	17.401	9.34681	12.2758	8.40051	10.7172	8.90233	11.777	22.8948	8.83672	9.99115	8.04476	8.99546	USP20	1	269995520	270086780	+	4231	protein_coding	PF00443:Ubiquitin carboxyl-terminal hydrolase|PF06337:DUSP domain|PF02148:Zn-finger in ubiquitin-hydrolases and other protein	UCH
novel.256	3.86737	3.67152	0.508747	2.32522	0	0.380911	1.07994	0	7.22056	1.63125	1.76537	1.69414	1.01801	0.705589	1.06951	2.21531	1.37483	0.882212	0.844339	1.02324	-	12	45098240	45100228	-	1148	-	-	-
novel.1279	7.96912	11.8355	0.558201	0.455395	74.6219	18.9301	3.032	16.8043	4.52082	4.29183	3.11877	2.55588	1.01184	2.22291	0.189827	2.38725	1.01945	10.7838	4.47277	1.22045	-	8	44284601	44385210	-	1617	-	-	-
ENSSSCG00000002014	0.46196	1.06308	0.537955	0.613564	0	0.221529	0.315537	0	0.365459	0.418541	0.527801	0.330584	0.420666	0.371208	0.170505	0.3451	0.331983	0.452021	0.616294	0.613887	JPH4	7	75522630	75549490	+	7501	protein_coding	PF02493:MORN repeat	MORN
ENSSSCG00000036790	1.79365	2.10631	3.94733	4.51192	5.26109	6.18197	13.9255	3.56259	2.02395	3.37345	2.41467	3.13719	7.99074	5.74321	3.96103	2.14299	5.47176	2.64611	3.51123	4.30778	AKAP7	1	32221065	32362001	-	5192	protein_coding	PF10470:PKA-RI-RII subunit binding domain of A-kinase anchor protein|PF10469:AKAP7 2'5' RNA ligase-like domain	-
ENSSSCG00000033089	6.4507	4.94972	5.35085	9.97902	16.3304	27.1372	25.6228	18.5586	2.55726	6.52099	8.42297	7.99896	19.0059	8.37732	8.90234	7.32577	10.9447	7.62026	10.3998	14.803	-	9	2866653	2981006	+	9367	protein_coding	-	-
ENSSSCG00000002774	11.2195	12.9503	6.86367	6.91538	5.09861	4.46778	5.04808	6.18328	8.57055	5.09901	5.51628	5.56245	5.76932	6.27741	5.55816	9.21458	6.54444	6.53195	5.78056	6.90245	RIPOR1	6	28132115	28183788	+	8339	protein_coding	PF15903:Filopodia upregulated, FAM65	-
ENSSSCG00000005471	4.08803	3.46979	5.76275	5.62706	0.815193	3.17037	2.94943	3.01959	3.24806	3.52068	4.87287	3.0871	2.99146	3.0406	2.72143	2.59119	3.49078	6.98951	5.1499	5.0394	SNX30	1	253428508	253550375	+	2331	protein_coding	PF00787:PX domain|PF03114:BAR domain	PX
ENSSSCG00000045433	0	0.454344	0.144384	0.0750926	0	0	0	0	0	0.0599114	0.0512669	0	0.0494363	0.0183561	0.00927455	0.00823313	0.0445093	0.0798294	0.040552	0.0851838	-	AEMK02000359.1	12971	19074	-	5516	lncRNA	-	-
ENSSSCG00000037598	22.3395	30.8533	20.4587	48.9231	62.9633	60.3095	133.079	32.3859	37.4364	53.4281	33.0083	80.227	49.4617	116.695	26.2376	21.3025	31.5566	38.3499	38.1688	49.2257	SNX10	18	46064579	46142945	-	2603	protein_coding	PF00787:PX domain	PX
novel.805	7.35743	1.58769	0.924995	1.84414	0	0.457094	1.2763	0	7.95967	1.7272	0.903215	0.931777	0.678672	0.793788	1.15864	4.19327	1.09986	0.997284	0.259797	1.06417	-	3	1823328	1826086	-	574	-	-	-
ENSSSCG00000017601	4.72463	3.91338	0.572486	0.761671	14.1754	10.7786	2.14787	11.0413	1.55481	2.07166	2.23366	2.19457	0.94752	1.24407	0.359186	1.87896	1.09054	7.01142	2.68295	0.989704	TOM1L1	12	31207369	31272775	+	3988	protein_coding	PF03127:GAT domain|PF00790:VHS domain	-
ENSSSCG00000010493	51.8691	98.7182	10.6747	10.319	276.479	318.93	26.9584	157.775	46.523	38.3236	31.8333	31.9691	17.0717	21.2323	2.6069	32.3143	14.7096	122.664	38.6164	14.2355	PDLIM1	14	106735492	106794777	-	3238	protein_coding	PF00595:PDZ domain (Also known as DHR or GLGF)|PF15936:Domain of unknown function (DUF4749)	PDZ
ENSSSCG00000029130	4.80527	7.87658	6.02726	4.17963	2.94151	1.53434	3.722	0.50678	8.08288	3.97884	4.23161	4.26507	3.8996	2.71677	3.11491	6.56135	4.19866	3.13554	2.57772	4.02472	ELANE	2	77509344	77516027	-	969	protein_coding	PF00089:Trypsin	Trypsin
ENSSSCG00000012258	6.85558	6.33987	15.4938	12.3461	36.86	25.547	34.8973	23.6666	4.70877	14.6454	11.6163	14.2028	19.627	16.1896	17.806	8.87952	14.0665	11.1511	12.9209	16.2021	FUNDC1	X	39724995	39737532	-	3396	protein_coding	PF04930:FUN14 family	-
